# Supplementary material for: Assessment of Drug Proarrhythmicity Using Artificial Neural Networks With in silico Deterministic Model Outputs
Source: Frontiers journal article supplement (doi:10.3389/fphys.2021.761691), 2021-12-10
Supplement: Data_Sheet_1.pdf [file Data_Sheet_1.pdf]

## Optimal model selection process

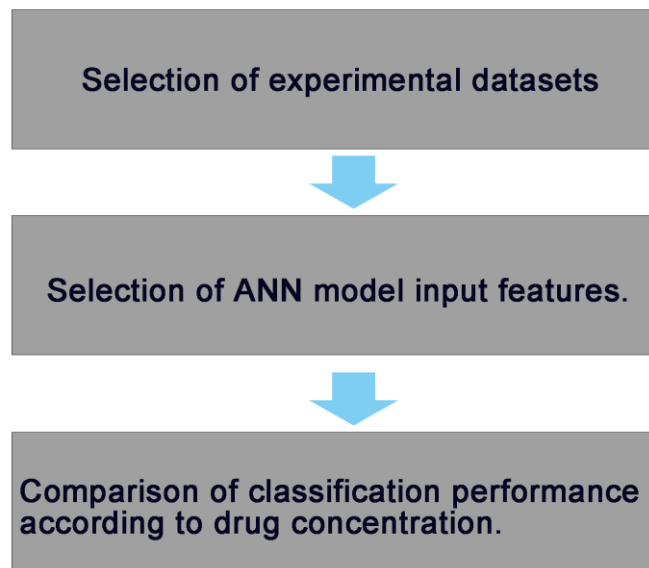

**Figure S1.**

We performed a process for the selection of the drug toxicity classifier model to find the best optimal model as shown in the schematic diagram. We compared the classifier's performance using two experimental data of Crumb data [1] and Chantest data [2], respectively. The classification performance was higher when using Crumb data than when using Chantest data. It was corresponded to the results of Li et al. and Zhou et al; they used the Cumb dataset to build the drug evaluation model [3], [4].

From the in silico simulation, we obtained 14 electrophysiological features; APD90, APD50, APDtriangulation (APDtri), CaD90, CaD50, CaD triangulation (CaDtri),  $dV_m/dt_{max}$ ,  $V_m$  peak,  $V_m$  resting, Ca transient peak, and Ca transient Resting, including qNet and qInward of the in silico model presented in Comprehensive In vitro proarrhythmia assay (CiPA). We tested the model performance by changing the combinations of input features. The combinations of input feature consisted of from 3 to 14 electrophysiological features, and the number of combinations was 13. Among the models using 13 combinations, the model using nine features of  $dV_m/dt_{max}$ , APresting, APD90, APD50, Ca resting, CaD90, CaD50, qNet, and qInward has the best performance. Accordingly, we empirically selected these nine features as the most optimal combinations (with a minimum AUC of 0.6 or higher in all-risk groups, Table 4).

In the previous research, the Li group calculated the average value of the features at 1,2,3,4 times the drug  $C_{max}$  concentration and used it as an input for the classification model. We used the average feature of  $C_{max}$  1-4 by following their protocol strictly to quantitatively compare the classification performances with them. To validate the average feature, we had tested several models using various concentration features in the development of a classification model for proarrhythmic drug risk. We compared the results of models using individual concentration features ( $C_{max}*1$  data,  $C_{max}*2$  data, and  $C_{max}*3$  data, and  $C_{max}*4$  data, respectively) and the model using summation features of  $C_{max}$  1-4 with the model using average features of  $C_{max}$  1-4. Among the six models we mentioned above, the ANN model using average features had the best performances than other models (Table 5). The data we used in this study are opened in CiPA website; Github.com/Yedam-Y/ANN.

As a result, we used the experimental data of Crumb et al. as input to the in silico model. Through the empirical research, we finally proposed an artificial neural network classification model with the averaged concentration of 9 features ( $dV_m/dt_{max}$ , APresting, APD90, APD50, Ca resting, CaD90, CaD50, qNet, qInward) as input.

**Table S1. Crumb et al. data IC50 and hill coefficient data information [1]**

|                           | IC50 (micro Mol)              |                               |                               |                       | hill coefficient  |                   |                  |                    |
|---------------------------|-------------------------------|-------------------------------|-------------------------------|-----------------------|-------------------|-------------------|------------------|--------------------|
| Drug name/<br>ion channel | INaL                          | ICaL                          | INa                           | IKr                   | INaL              | ICaL              | INa              | IKr                |
| dofetilide                | 126 (0.015, 5.68e+06)         | 44.5 (0.0123, 5.58e+06)       | 1.36 (0.011, 1.74e+06)        | 0.0014(0.0011,0.0018) | 1.1 (0.15, 9.5)   | 3.6 (0.32, 9.6)   | 1.1 (0.24, 9.1)  | 0.63(0.48, 0.79)   |
| quinidine                 | 9.46 (7.8, 12.4)              | 53.5 (29.6, 141)              | 12.4 (9.06, 21.5)             | 0.34(0.24, 0.44)      | 1.3 (1, 1.7)      | 0.58 (0.44, 0.74) | 1.5 (1, 2.2)     | 1.04(0.70, 1.47)   |
| sotalol                   | 3.28e+03 (2.61e+03, 6.46e+03) | 7.13e+03 (4.34e+03, 1.62e+04) | 1.12e+05 (3.22e+03, 7.85e+06) | 91.69(59.2, 135.9)    | 4.8 (1.9, 9.6)    | 0.87 (0.59, 1.3)  | 0.86 (0.39, 8.4) | 0.98(0.72, 1.54)   |
| bepidil                   | 1.82 (1.56, 2.12)             | 2.82 (1.95, 5.31)             | 2.96 (2.42, 4.03)             | 0.16 (0.097, 0.258)   | 1.4 (1.1, 1.8)    | 0.65 (0.44, 0.92) | 1.2 (0.81, 1.7)  | 0.96 (0.614, 3.01) |
| cholorpromazine           | 4.59 (3.77, 5.57)             | 8.32 (6.13, 12.3)             | 4.58 (3.72, 6.01)             | 1.13(0.85, 1.55)      | 0.94 (0.78, 1.1)  | 0.85 (0.61, 1.2)  | 2.1 (1.6, 3.1)   | 0.90(0.70, 1.23)   |
| cisapride                 | 9.26e+03 (3.43, 7.28e+06)     | 1.03e+03 (0.359, 6.36e+06)    | 1.79e+03 (0.277, 5.32e+06)    | 0.011 (0.007, 0.018)  | 6.3 (1.8, 9.8)    | 4.8 (0.41, 9.7)   | 0.67 (0.23, 9.4) | 0.63(0.49, 0.84)   |
| ondansetron               | 19.3 (15.8, 24.7)             | 22.7 (16.1, 38.6)             | 38.5 (22.5, 301)              | 1.55(1.03, 2.35)      | 1 (0.8, 1.4)      | 0.76 (0.55, 1)    | 1.6 (0.5, 8.7)   | 1.00(0.71, 1.53)   |
| terfenadine               | 14.9 (1.48, 2.31e+03)         | 0.704 (0.612, 0.817)          | 1.73 (0.974, 13.9)            | 0.019(0.011, 0.032)   | 0.66 (0.27, 3.2)  | 0.66 (0.59, 0.74) | 2.4 (0.6, 9.2)   | 0.60(0.44, 0.87)   |
| mexiletine                | 9.02 (7.71, 11.3)             | 38.9 (22.3, 114)              | 26.1 (13.4, 9.46e+05)         | 28.2(13.0, 110.9)     | 1.4 (1, 1.8)      | 1 (0.65, 1.6)     | 3.8 (0.4, 9.5)   | 4.38 (1.43, 9.68)  |
| verapamil                 | 24.1 (1.32, 3.44e+06)         | 0.204 (0.163, 0.25)           | 2.59e+03 (2.51, 6.35e+06)     | 0.50(0.43, 0.59)      | 2 (0.22, 9.4)     | 1.1 (0.86, 1.4)   | 3.5 (0.37, 9.7)  | 1.10(0.89, 1.36)   |
| ranolazine                | 7.94 (6.2, 10.3)              | 900 (35.2, 5.88e+06)          | 53.3 (27.4, 538)              | 6.66(5.05, 9.23)      | 0.95 (0.72, 1.3)  | 3.9 (0.49, 9.6)   | 1.9 (0.62, 9.1)  | 0.84(0.65, 1.06)   |
| diltiazem                 | 21.6 (16.7, 30.8)             | 0.113 (0.0747, 0.167)         | 36.9 (15, 385)                | 6.74(5.27, 8.64)      | 0.68 (0.55, 0.91) | 0.72 (0.53, 1)    | 1.4 (0.47, 8.7)  | 0.79(0.66, 0.99)   |

**Table S2. Chantest dataset IC50 and hill coefficient data information [2]**

|                           | IC50(micro Mol)                   |                                  |                                  |                              | hill coefficient         |                           |                          |                       |
|---------------------------|-----------------------------------|----------------------------------|----------------------------------|------------------------------|--------------------------|---------------------------|--------------------------|-----------------------|
| Drug name/<br>ion channel | INaL                              | ICaL                             | INa                              | IKr                          | INaL                     | ICaL                      | INa                      | IKr                   |
| dofetilide                | 5262000<br>(248100, 9683<br>000)  | 5351000<br>(268500, 9771<br>000) | 4937000<br>(260600, 9594<br>000) | 5198000<br>(241100, 9532000) | 1.4<br>(0.57, 1<br>.97)  | 1.40<br>(0.55, 1.<br>97)  | 1.38<br>(0.55, 1.<br>96) | 1.42<br>(0.57, 1.97)  |
| quinidine                 | 5265000<br>(248400 9839<br>000)   | 5452000<br>(266000, 9679<br>000) | 5232000<br>(254000, 9908<br>000) | 17.16(13.<br>5, 29.4)        | 1.38<br>(0.53, 1<br>.9)  | 1.35<br>(0.54, 1.<br>97)  | 1.35<br>(0.54, 1.<br>96) | 1.42<br>(0.86, 1.95)  |
| sotalol                   | 4650000<br>(244500, 9790<br>000)  | 4771000<br>(254300, 9805<br>000) | 4948000<br>(284400, 9735<br>000) | 4800000<br>(141100, 976800)  | 1.40<br>(0.56, 1<br>.97) | 1.41<br>(0.582, 1.97)     | 1.42<br>(0.59, 1.<br>97) | 1.26<br>(0.53, 1.95)  |
| bepidil                   | 5313000(2181<br>00,9847000)       | 4842000(2351<br>00,9689000)      | 4195000(2520<br>00,9513000)      | 5328(261.<br>4, 9843)        | 1.41(0.<br>57,1.97<br>)  | 1.36(0.5<br>4, 1.97)      | 1.32(0.5<br>4, 1.96)     | 1.42(0.<br>58,1.9)    |
| clarithromycin            | 11.4<br>(3.88, 117.8)             | 2377000<br>(53040, 37080<br>00)  | 10.7<br>(3.26, 833.3)            | 3893000<br>(219200, 9636000) | 0.98<br>(0.53, 1<br>.9)  | 1.256<br>(0.55, 1.<br>96) | 1.19<br>(0.56, 1.<br>93) | 1.31<br>(0.56, 1.96)  |
| cisapride                 | 46100000<br>(227700, 9843<br>000) | 4693000<br>(229500, 9487<br>000) | 4937000<br>(235700, 9781<br>000) | 5891000<br>(241500, 9824000) | 1.39<br>(0.55, 1<br>.97) | 1.43<br>(0.58, 1.<br>97)  | 1.41<br>(0.56, 1.<br>97) | 1.14<br>(0.53, 1.94)  |
| ondansetron               | 5322000<br>(274700, 9789<br>000)  | 5645000<br>(221700, 9986<br>000) | 4901000<br>(245700, 9650<br>000) | 4603000<br>(218500, 8821000) | 1.40<br>(0.59, 1<br>.96) | 0.75<br>(0.50, 1.<br>93)  | 1.37<br>(0.55, 1.<br>97) | 1.42<br>(0.583, 1.97) |
| terfenadine               | 5295000<br>(243600, 9841<br>000)  | 5136000<br>(261900, 9730<br>000) | 4772000<br>(244800, 9890<br>000) | 4784000<br>(259600, 9752000) | 1.38<br>(0.578, 1.972)   | 1.38<br>(0.56, 1.<br>97)  | 1.36<br>(0.54, 1.<br>97) | 1.4<br>(0.57, 1.96)   |
| mexiletine                | 253.2<br>(96.13, 22670<br>)       | 230<br>(103.9, 1311)             | 2645000<br>(5062, 588000<br>0)   | 68.5<br>(57.8, 85.<br>3)     | 1.24<br>(0.57, 1<br>.94) | 1.0<br>(0.53, 1.<br>88)   | 1.35<br>(0.57, 1.<br>96) | 1.26<br>(0.97, 1.64)  |
| verapamil                 | 4956000<br>(253000, 9476<br>000)  | 3,56<br>(1.98, 6.684)            | 4916000<br>(251100, 9935<br>000) | 5314000<br>(226900, 9896000) | 1.39<br>(0.56, 1<br>.96) | 0.57<br>(0.50, 0.<br>81)  | 1.44<br>(0.59, 1.<br>97) | 1.40<br>(0.57, 1.97)  |
| ranolazine                | 4702000<br>(254100, 9729<br>000)  | 4701000<br>(263700, 9847<br>000) | 4397000<br>(199800, 9619<br>000) | 87.2<br>(60.14, 14<br>9.3)   | 1.43<br>(0.58, 1<br>.97) | 1.33<br>(0.53, 1.<br>96)  | 1.34<br>(0.55, 1.<br>97) | 1.08<br>(0.72, 1.6)   |
| diltiazem                 | 119.8<br>(69.1, 303)              | 32.4<br>(22.77, 45.9.)           | 4733000<br>(218300, 9786<br>000) | 19.7<br>(17.6, 22.<br>13)    | 0.91<br>(0.53, 1<br>.75) | 1.24<br>(0.77, 1.<br>83)  | 1.39<br>(0.55, 1.<br>97) | 1.28<br>(1.12, 1.46)  |

**Table S3. Classification performance according to experimental data.**

The performance test of the ANN model was performed with two data, Chantest data[2] and Crumb data[1]. It shows high performance when in silico model as the input used crumb data. Nine features calculated using each experimental data as input of the in silico model were used as input of the ANN model. The features were an average of 1, 2, 3, and 4 times the Cmax concentration, and we used 2,000 samples according to each drug. The test result is an AUC result calculated using 10,000 datasets. Among the 10,000 test results, it was expressed as an intermediate value (CI95%).

|                   | high            | intermediate    | low             |
|-------------------|-----------------|-----------------|-----------------|
| Crumb data [1]    | 0.92(0.85-0.96) | 0.83(0.73-0.91) | 0.98(0.91-1)    |
| Chantest data [2] | 0.90(0.83-0.95) | 0.68(0.58-0.72) | 0.89(0.85-0.94) |

**Table S4. Performance of classifier by concentration (based on AUC)**

We tested which drug concentration the nine features calculated have the highest performance. The data in the table expressed the 'median value (minimum value-maximum value)' among the tests of 10,000 datasets. Using the averaged value of Cmax 1-4 times had the highest performance.

|                      | High            | intermediate     | low             | Sample number /drug |
|----------------------|-----------------|------------------|-----------------|---------------------|
| Cmax* 1              | 0.98(0.60-1)    | 0.71(0.42-0.92)  | 0.84(0.70-0.96) | 2,000/1 drug        |
| Cmax *2              | 0.92(0.56-1)    | 0.68(0.38-0.90)  | 0.87(0.70-1)    | 2,000/1 drug        |
| Cmax *3              | 0.96(0.77-1)    | 0.75(0.508-0.93) | 0.91(0.74-1)    | 2,000/1 drug        |
| Cmax *4              | 0.83(0.64-0.95) | 0.71(0.46-0.92)  | 0.93(0.69-1)    | 2,000/1 drug        |
| Total of Cmax 1-4    | 0.94(0.67-1)    | 0.73(0.48-0.89)  | 0.84(0.6-1)     | 8,000/1 drug        |
| Averaged of Cmax 1-4 | 0.92(0.80-1)    | 0.83(0.69-0.95)  | 0.98(0.91-1)    | 2,000/1 drug        |

**Table S5. Comparison of model performance according to features combination (based on AUC)**

Among the nine features selected by empirical trials, we confirmed the results of using various feature combinations. Among the various combinations, we obtained the results of nine combinations except for those with a value of 0.6 or less among AUCs in high-risk, intermediate-risk, and low-risk groups. This test is a table comparing the median values through 1,000 tests.

| Features combination                                                                        | High  | intermediate | low   |
|---------------------------------------------------------------------------------------------|-------|--------------|-------|
| APD90,CaD90,qnet                                                                            | 0.88  | 0.746        | 0.845 |
| APDtri,CaD90,qnet                                                                           | 0.85  | 0.67         | 0.79  |
| APD90,CaDtri, qnet                                                                          | 0.81  | 0.60         | 0.80  |
| dVm/dtmax,Ca peak,qnet, qinward                                                             | 0.86  | 0.667        | 0.75  |
| APD90,CaD90,qnet,qinward                                                                    | 0.86  | 0.73         | 0.74  |
| APD90,APD50,CaD90,CaD50,qnet                                                                | 0.81  | 0.78         | 0.83  |
| dVm/dtmax, APresting, APD90,CaD90, qnet                                                     | 0.83  | 0.69         | 0.81  |
| Ca resting,CaD50,APD90,CaD90, qnet                                                          | 0.875 | 0.619        | 0.836 |
| APD50,ca resting, APD90,CaD90, qnet, qinward                                                | 0.78  | 0.61         | 0.68  |
| dVm/dtmax, APresting, APD90, APD50, Ca <sub>resting</sub> , CaD90, CaD50, qNet, and qInward | 0.92  | 0.83         | 0.98  |

**Table S6. The effect of each of the nine features on the performance of the model**

This table is a test result table for the ANN model, which inputs eight features, excluding one out of 9 features. We compared the median values of 1,000 tests. We confirmed the effect of one of the nine features selected as optimal on the classification of high-risk, intermediate-risk, and low-risk groups.

| Exception feature | high | inter | low   |
|-------------------|------|-------|-------|
| APD50             | 0.92 | 0.58  | 0.88  |
| APD90             | 0.92 | 0.59  | 0.86  |
| Apresting         | 0.88 | 0.65  | 0.83  |
| CaD50             | 0.85 | 0.59  | 0.8   |
| CaD90             | 0.9  | 0.63  | 0.84  |
| Caresting         | 0.91 | 0.75  | 0.9   |
| dVm/dtmax         | 0.84 | 0.68  | 0.71  |
| qinward           | 0.91 | 0.46  | 0.92  |
| qnet              | 0.9  | 0.51  | 0.872 |

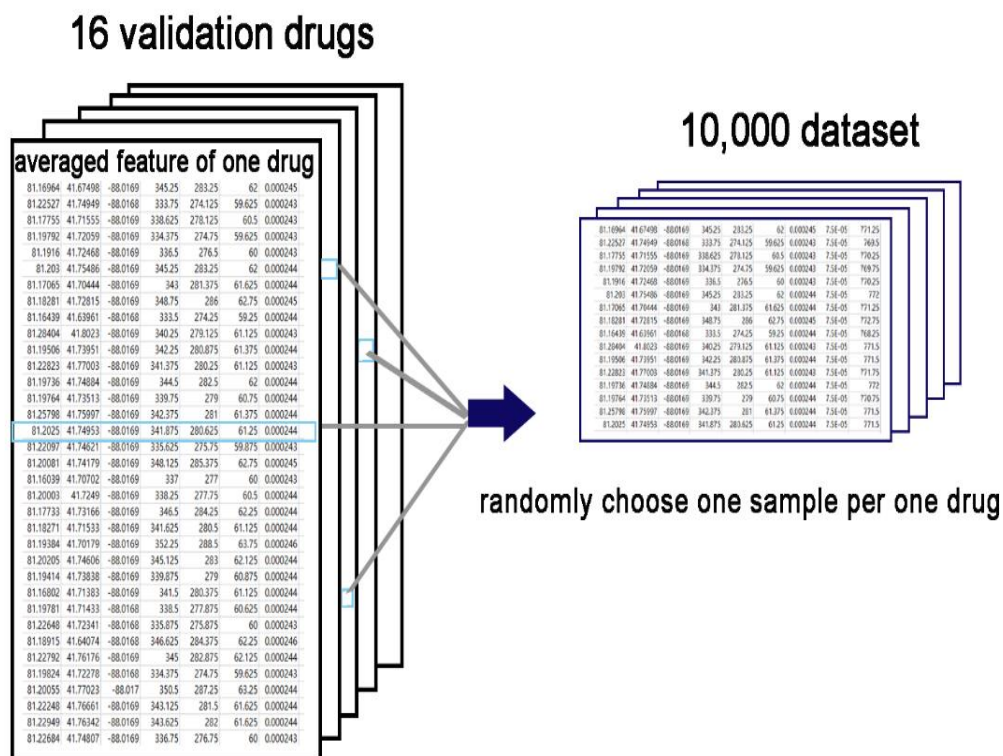

**Figure S2.** A single dataset is created by taking one random sample from 16 drug data (2,000/1 drug) averaged according to concentration. An example of an average of 2,000 samples with Cmax 1-4 on the left, and 10,000 samples on the right, containing 16 drug data, one made by taking one sample out of 2,000 drugs.

**Table S7.** Comparison table between the drug risk group and the actual risk group predicted through the test. The number of labels predicted by each drug through the model, and the probability predicted, were expressed as median (minimum to maximum) in 10,000 tests. Gray marks are misclassified drugs.

| Drug name      | True label | Predicted True label Probability | Number of Predicted low | Number of Predicted intermediate | Number of Predicted high |
|----------------|------------|----------------------------------|-------------------------|----------------------------------|--------------------------|
| ibutilide      | high       | 0.776(0.765-0.784)               | 0                       | 0                                | 10000                    |
| vandetanib     | high       | 0.754(0.748-0.763)               | 0                       | 0                                | 10000                    |
| disopyramide   | high       | 0.223(0.179-0.298)               | 0                       | 10000                            | 0                        |
| azimilide      | high       | 0.290(0.225-0.363)               | 0                       | 9991                             | 9                        |
| risperidone    | inter      | 0.442(0.435-0.461)               | 0                       | 10000                            | 0                        |
| domperidone    | inter      | 0.442(0.428-0.458)               | 36                      | 9964                             | 0                        |
| droperidol     | inter      | 0.419(0.400-0.430)               | 0                       | 9883                             | 117                      |
| clarithromycin | inter      | 0.438(0.427-0.450)               | 8                       | 9992                             | 0                        |
| clozapine      | inter      | 0.425(0.411-0.428)               | 0                       | 10000                            | 0                        |
| astemizole     | inter      | 0.434(0.422-0.440)               | 0                       | 10000                            | 0                        |
| pimozide       | inter      | 0.440(0.431-0.490)               | 339                     | 9661                             | 0                        |
| metoprolol     | low        | 0.877(0.871-0.883)               | 9579                    | 421                              | 0                        |
| nifedipine     | low        | 0.619(0.609-0.631)               | 10000                   | 0                                | 0                        |
| nitrendipine   | low        | 0.511(0.501-0.530)               | 9958                    | 42                               | 0                        |
| loratadine     | low        | 0.415(0.403-0.421)               | 0                       | 10000                            | 0                        |
| tamoxifen      | low        | 0.394(0.372-0.416)               | 0                       | 10000                            | 0                        |

## Reference

- [1] W. J. Crumb, J. Vicente, L. Johannesen, and D. G. Strauss, “An evaluation of 30 clinical drugs against the comprehensive in vitro proarrhythmia assay (CiPA) proposed ion channel panel,” *J. Pharmacol. Toxicol. Methods*, vol. 81, pp. 251–262, 2016, doi: 10.1016/j.vascn.2016.03.009.
- [2] X. Han *et al.*, “A general procedure to select calibration drugs for lab-specific validation and calibration of proarrhythmia risk prediction models: An illustrative example using the CiPA model,” *J. Pharmacol. Toxicol. Methods*, vol. 105, no. June, p. 106890, 2020, doi: 10.1016/j.vascn.2020.106890.
- [3] Z. Li *et al.*, “Assessment of an In Silico Mechanistic Model for Proarrhythmia Risk Prediction Under the CiPA Initiative,” *Clin. Pharmacol. Ther.*, vol. 105, no. 2, pp. 466–475, 2019, doi: 10.1002/cpt.1184.
- [4] X. Zhou *et al.*, “Blinded in silico drug trial reveals the minimum set of ion channels for torsades de pointes risk assessment,” *Front. Pharmacol.*, vol. 10, no. January, pp. 1–17, 2020, doi: 10.3389/fphar.2019.01643.
